# Supplementary material for: Surface bio-interactions stand at the base of the short-term nano CuO-induced cell oxidative stress: insights for a safe(r)-by-design approach
Source: Research Square preprint supplement (doi:10.21203/rs.3.rs-1306935/v1), 2022-02-03
Supplement: Supplementary file 1 [file 89911bba713beffcb2b83ed5.docx]

**Surface bio-interactions stand at the base of the short-term nano CuO-induced cell oxidative stress: insights for a safe(r)-by-design approach**

**ADDITIONAL FILE 3**

Elisa Moschini1,4, Graziano Colombo2, Giuseppe Chirico3, Giancarlo Capitani1, Isabella Dalle-Donne2, Paride Mantecca1*

*1 Department of Earth and Environmental Sciences, Research Center POLARIS, University of Milano Bicocca, 1 Piazza della Scienza - 20126 Milan, Italy*

*2 Department of Biosciences, Università degli Studi di Milano, 26 via Celoria - 20133 Milan, Italy*

*3 Department of Physic, University of Milano Bicocca, 2 Piazza della Scienza - 20126 Milano, Italy*

*4 Luxembourg Institute of Science and Technology (LIST), Environmental Research and Innovation (ERIN) Department, 41, rue du Brill, L-4422 Belvaux, Grand-Duchy of Luxembourg*

***1. Copper cytochemistry***

Intracellular copper ion dissolution was determined by a cytochemical method using rhodanine. After exposure to 10 mg/ml and 25 mg/ml CuO NPs for 6h. Cells were rinsed, formalin fixed, and incubated with 0.12 g/l rhodanine (p-Dimethylaminobenzylinene-rhodanine) alcoholic solution. Abundantly rinsing was done and nuclei were counterstained with haematoxylin. Slides were mounted in a glycerol-based medium and immediately observed under the light microscope (Axioplan - Zeiss).

Results from this test are summarised in Additional Figure 4.

*
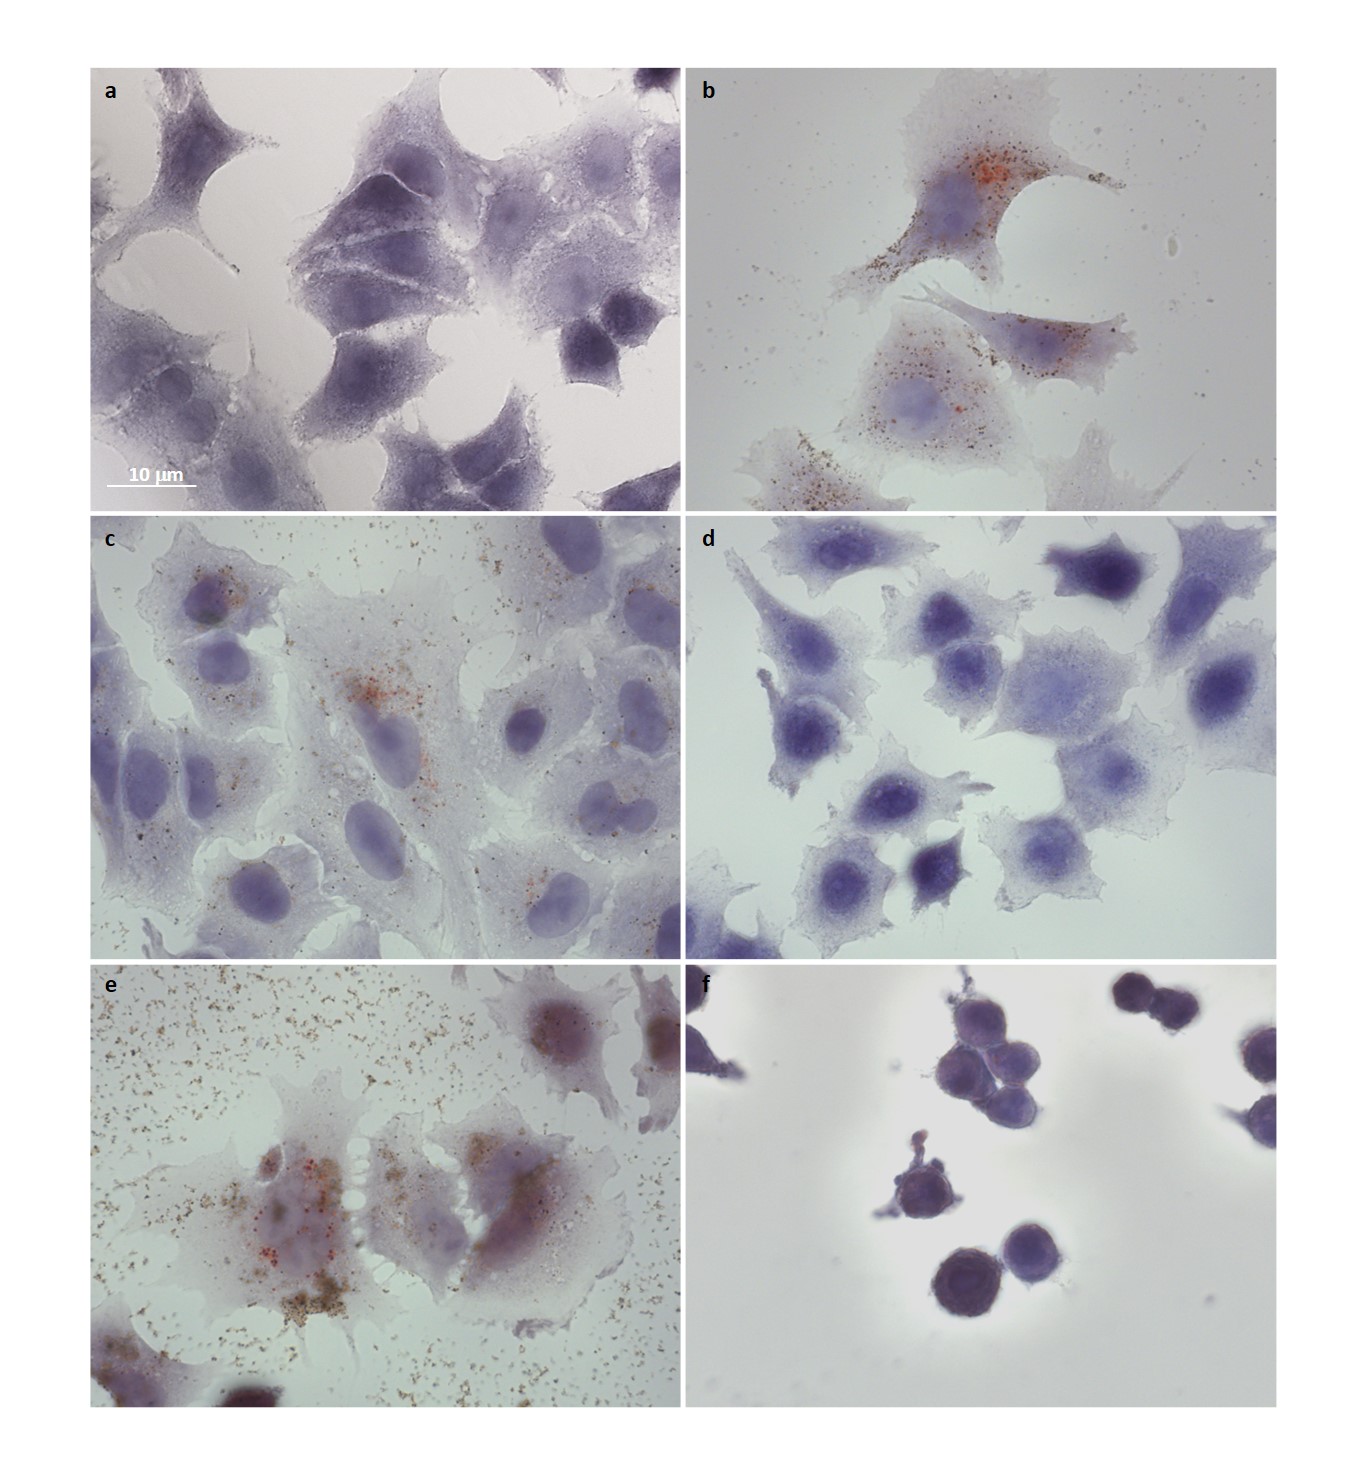
*

Additional Figure 4. Cytochemistry of Cu2+ by Rhodanine staining in A549 exposed to nCuO for 6h. a) negative control (unexposed cells); b) positive control (10 mg/ml cCuO-BSA-exposed cells, 24h); c, e) 10 mg/ml and 25 mg/ml cCuO-exposed cells; d, f) 10 mg/ml and 25 mg/ml sCuO-exposed cells. Red/orange spots testify for the intracellular release of Cu++ (b, c, e).
